# Supplementary material for: A modular network model of aging
Source: PubMed Central journal article supplement — Mol Syst Biol. 2007 Dec 4;3:147. doi: 10.1038/msb4100189 (PMC2174624; doi:10.1038/msb4100189), 2007-12-04

# Supplementary Figure 1

**A**

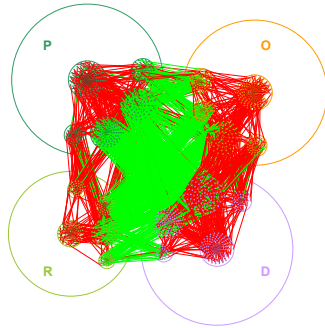

**B**

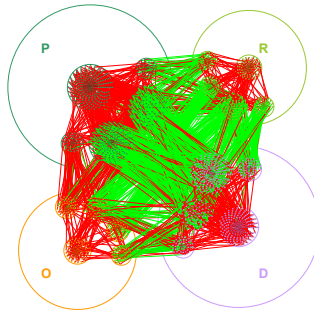

## Supplementary Figure 2

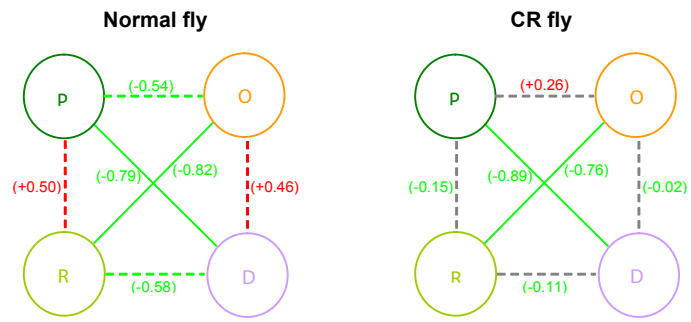

# Supplementary Figure 3A

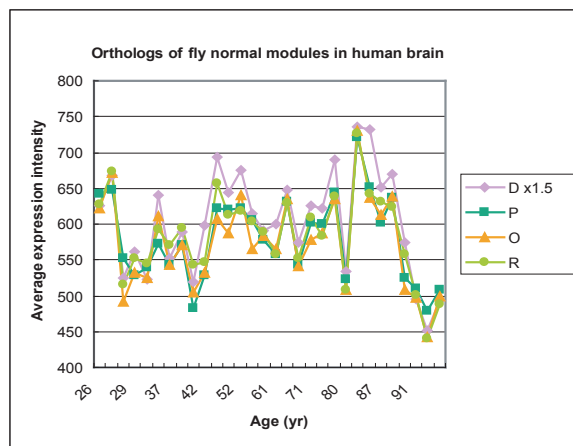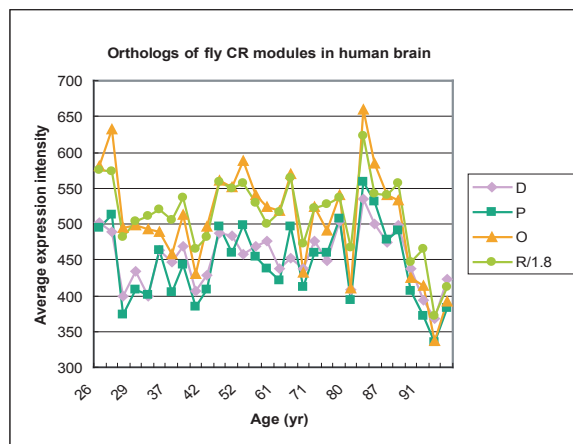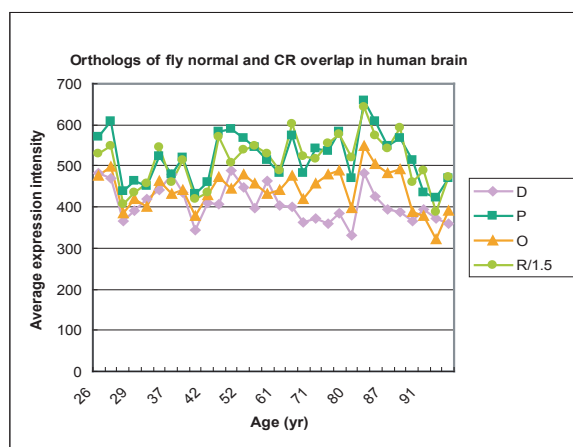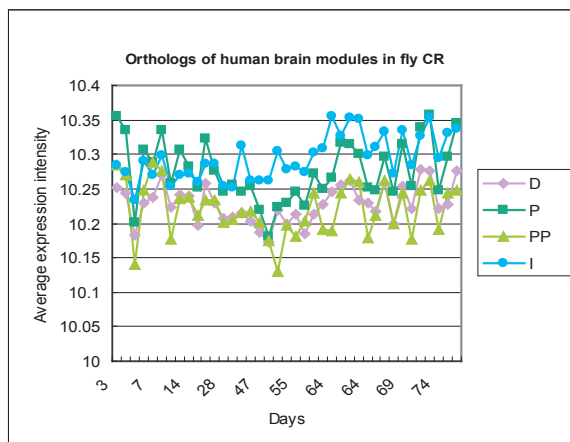



# Supplementary Figure 4

## Normal Specific

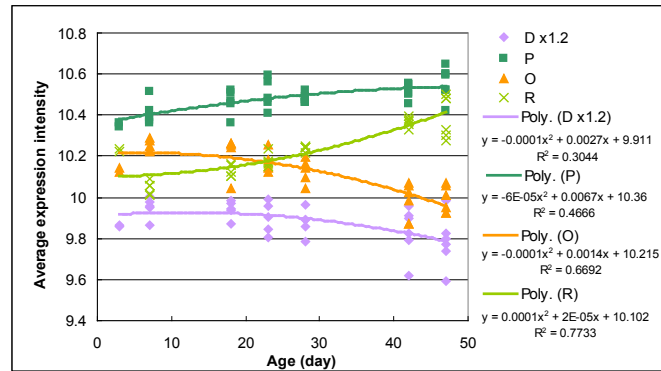

## CR Specific

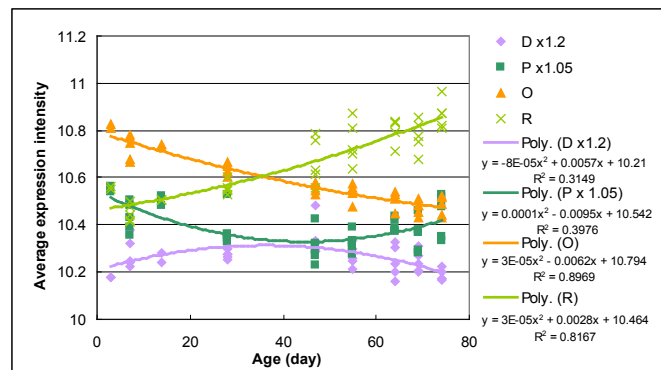

## Supplementary Figure 5

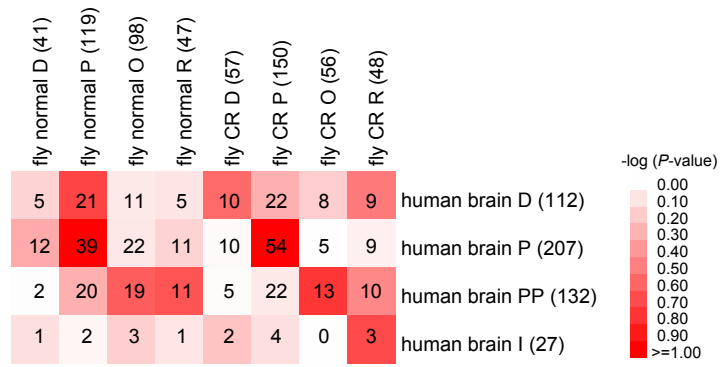

## Supplementary Figure 6

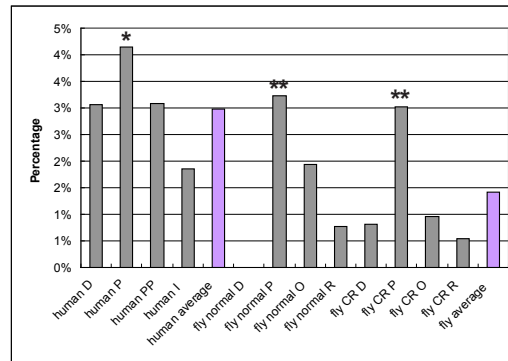

# Supplementary Figure 7

A

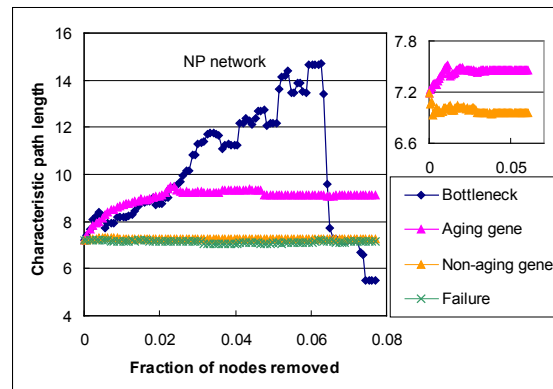

B

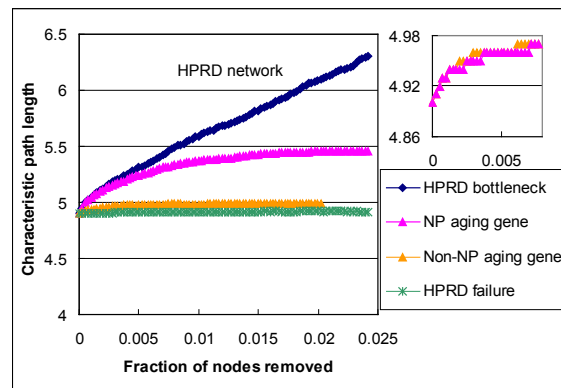

C

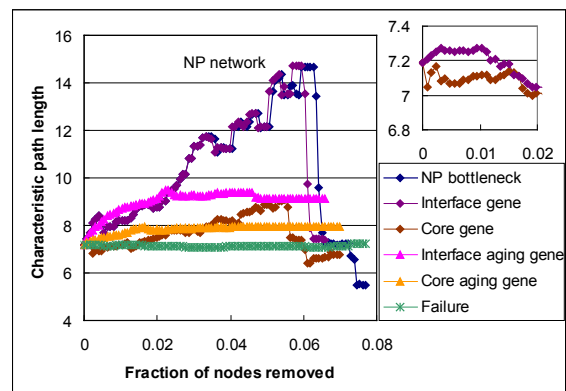



# Supplementary Figure 8

**A**

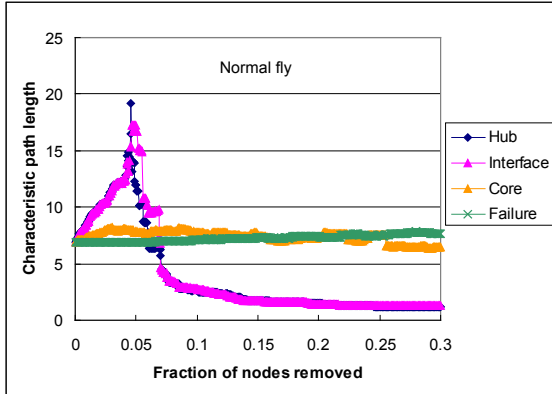

**B**

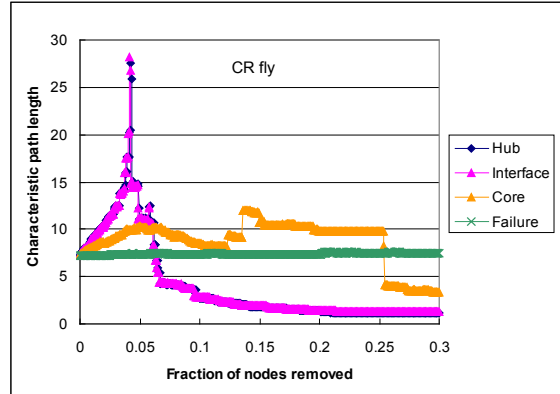

**C**

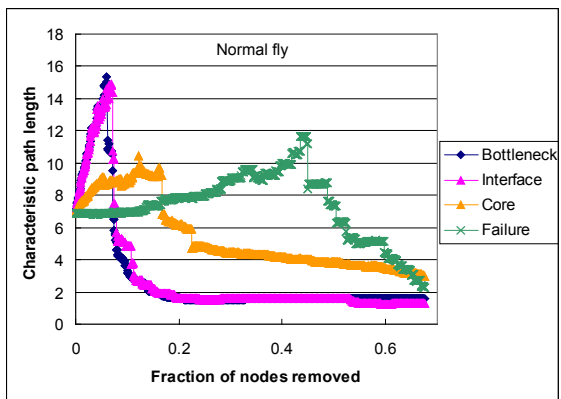

**D**

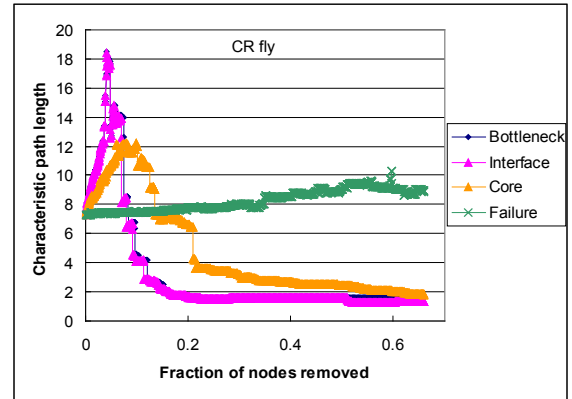

Supplement: msb4100189-s2.pdf [file msb4100189-s2.pdf]
